# Supplementary material for: Integrative biochemical, proteomics and metabolomics cerebrospinal fluid biomarkers predict clinical conversion to multiple sclerosis
Source: PubMed Central journal article supplement (PMC8111065; doi:10.1093/braincomms/fcab084), 2021-04-19
Supplement: fcab084_supplementary_data.pdf [file fcab084_supplementary_data.pdf]

Supplementary Information.

## **Integrative biochemical, proteomics, and metabolomics cerebrospinal fluid biomarkers predict clinical conversion to multiple sclerosis.**

**Running head:** Integrative biomarkers predict conversion to MS

Fay Probert PhD<sup>1,5</sup>, Tianrong Yeo MD, PhD<sup>1,2</sup>, Yifan Zhou MSc<sup>1</sup>, Megan Sealey PhD<sup>1</sup>, Siddharth Arora PhD<sup>3</sup>, Jacqueline Palace MD<sup>4</sup>, Timothy DW Claridge PhD<sup>5</sup>, Rainer Hillenbrand PhD<sup>6</sup>, Johanna Oechtering MD<sup>7</sup>, David Leppert MD<sup>7</sup>, Jens Kuhle MD, PhD<sup>7</sup>, Daniel C Anthony PhD<sup>1</sup>.

### **Affiliations**

- 1 Department of Pharmacology, University of Oxford, UK.
- 2 Department of Neurology, National Neuroscience Institute, Singapore.
- 3 Mathematical Institute, University of Oxford, UK.
- 4 Nuffield Department of Clinical Neurosciences, John Radcliffe Hospital, University of Oxford, UK.
- 5 Department of Chemistry, University of Oxford, UK.
- 6 Novartis Pharma AG, Basel, Switzerland.
- 7 Neurology, Departments of Medicine, Clinical Research and Biomedicine, University Hospital Basel, University of Basel, Switzerland.

**Correspondence to:** Jens Kuhle ([Jens.Kuhle@usb.ch](mailto:Jens.Kuhle@usb.ch)).

**Correspondence may also be sent to:** Daniel Anthony ([Daniel.anthony@pharm.ox.ac.uk](mailto:Daniel.anthony@pharm.ox.ac.uk))

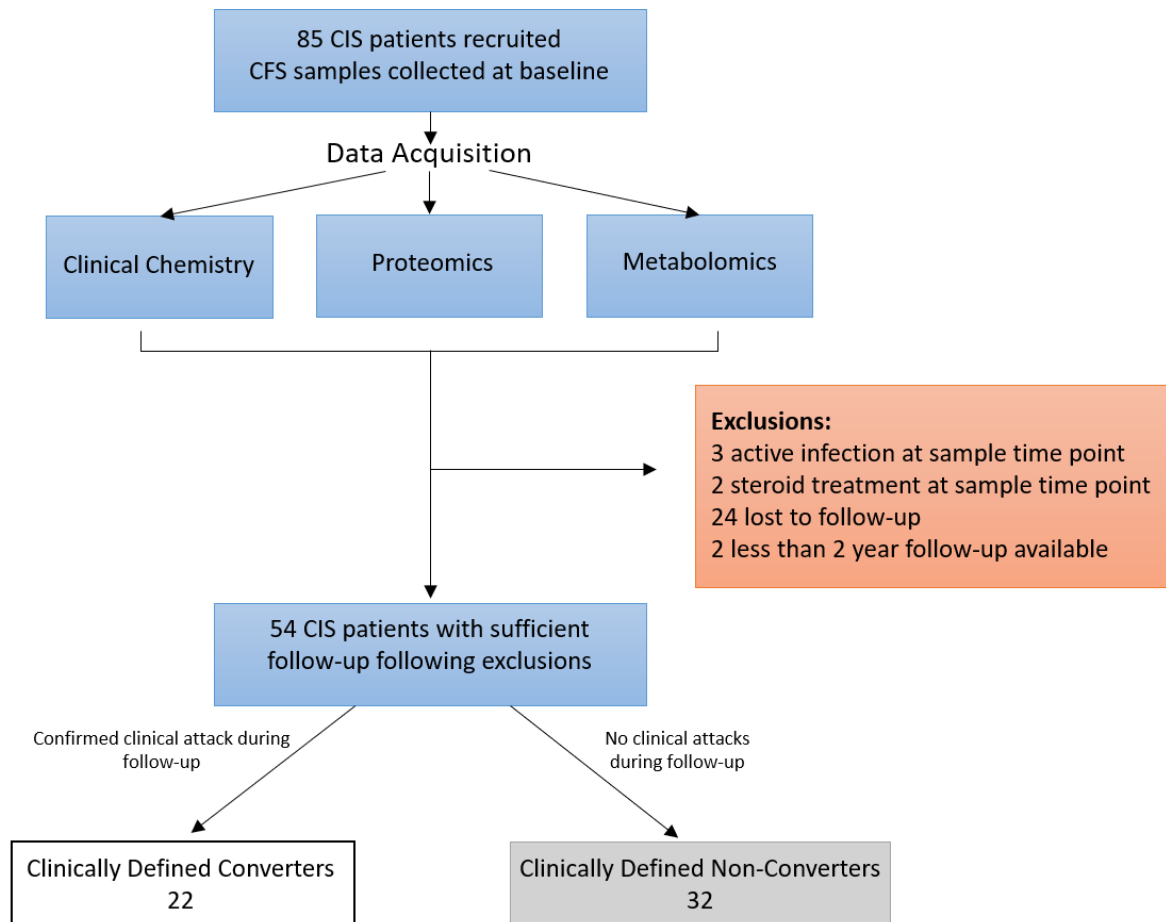

**Supplementary Figure 1. Flow diagram illustrating numbers of individuals included in the study and reasons for exclusion.** 85 patients were recruited at CIS onset, CSF samples were collected at baseline and clinical chemistry, proteomics, and metabolomics data was acquired on all samples. 26 of the patients either had no follow-up data or less than 2 years of follow-up and thus were excluded from the analysis. Three patients were confirmed to have active infections and two were receiving steroid treatment at the time of CSF sampling and were excluded from the analysis. Thus, a total of 54 patient samples were confirmed to be eligible analysis and were stratified into clinically defined converter and non-converter groups using the follow-up data.

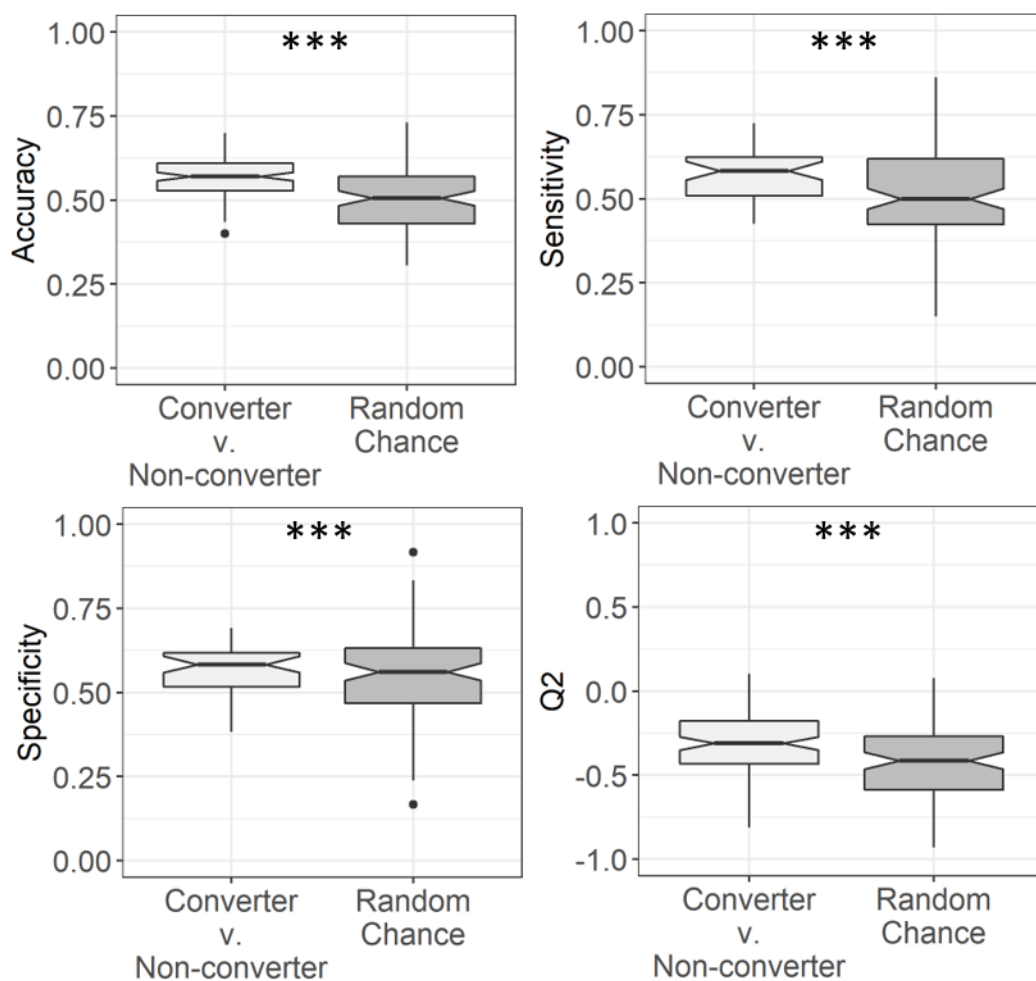

**Supplementary Figure 2. Validating metabolomics OPLS-DA models on independent test data.** 10-fold cross-validation with repetition reveals significantly increased accuracy, sensitivity, specificity and Q2 on independent test data (excluded when training the model) relative to the null distribution produced by permutation testing (the performance expected by random chance alone). Two-sample Kolmogorov-Smirnov p-values < 0.001 are represented by \*\*\*.

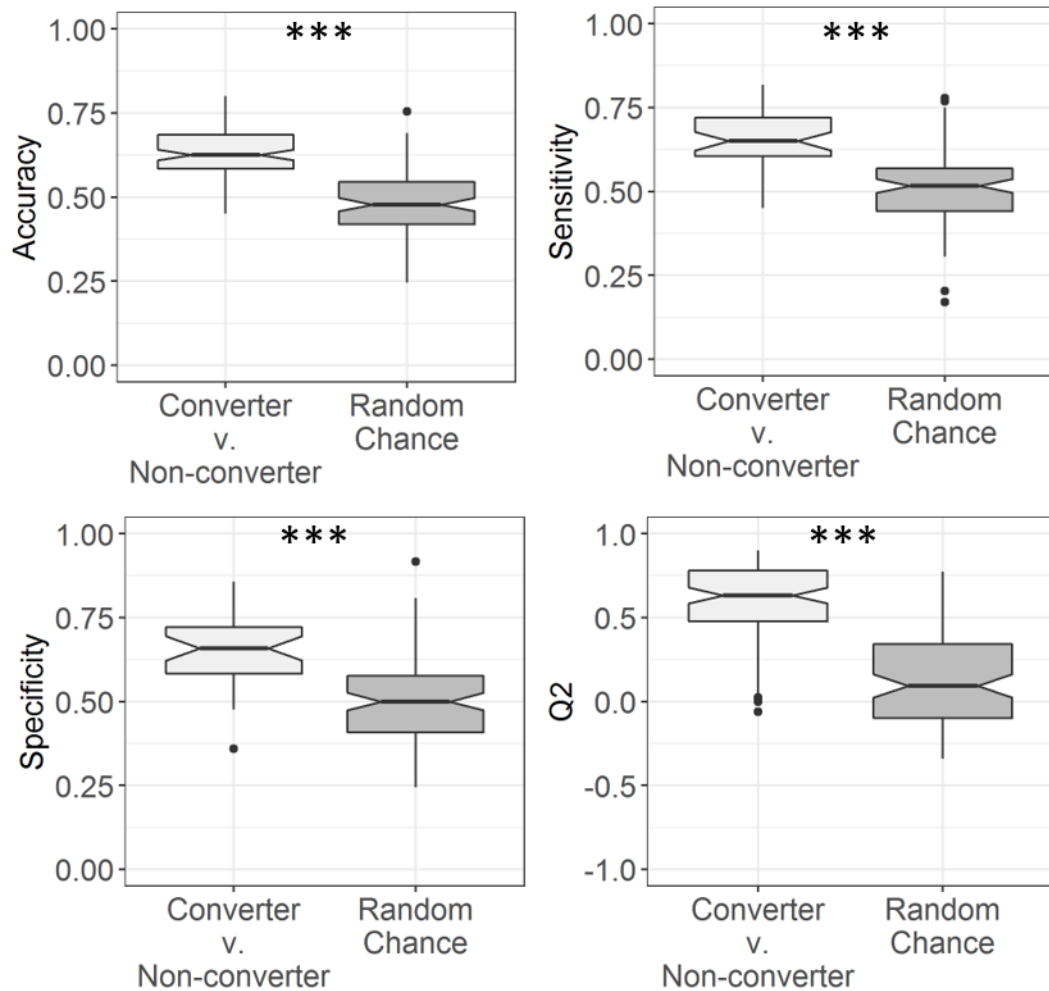

**Supplementary Figure 3. Validating proteomics OPLS-DA models on independent test data.** 10-fold cross-validation with repetition reveals significantly increased accuracy, sensitivity, specificity and Q2 on independent test data (excluded when training the model) relative to the null distribution produced by permutation testing (the performance expected by random chance alone). Two-sample Kolmogorov-Smirnov p-values < 0.001 are represented by \*\*\*.

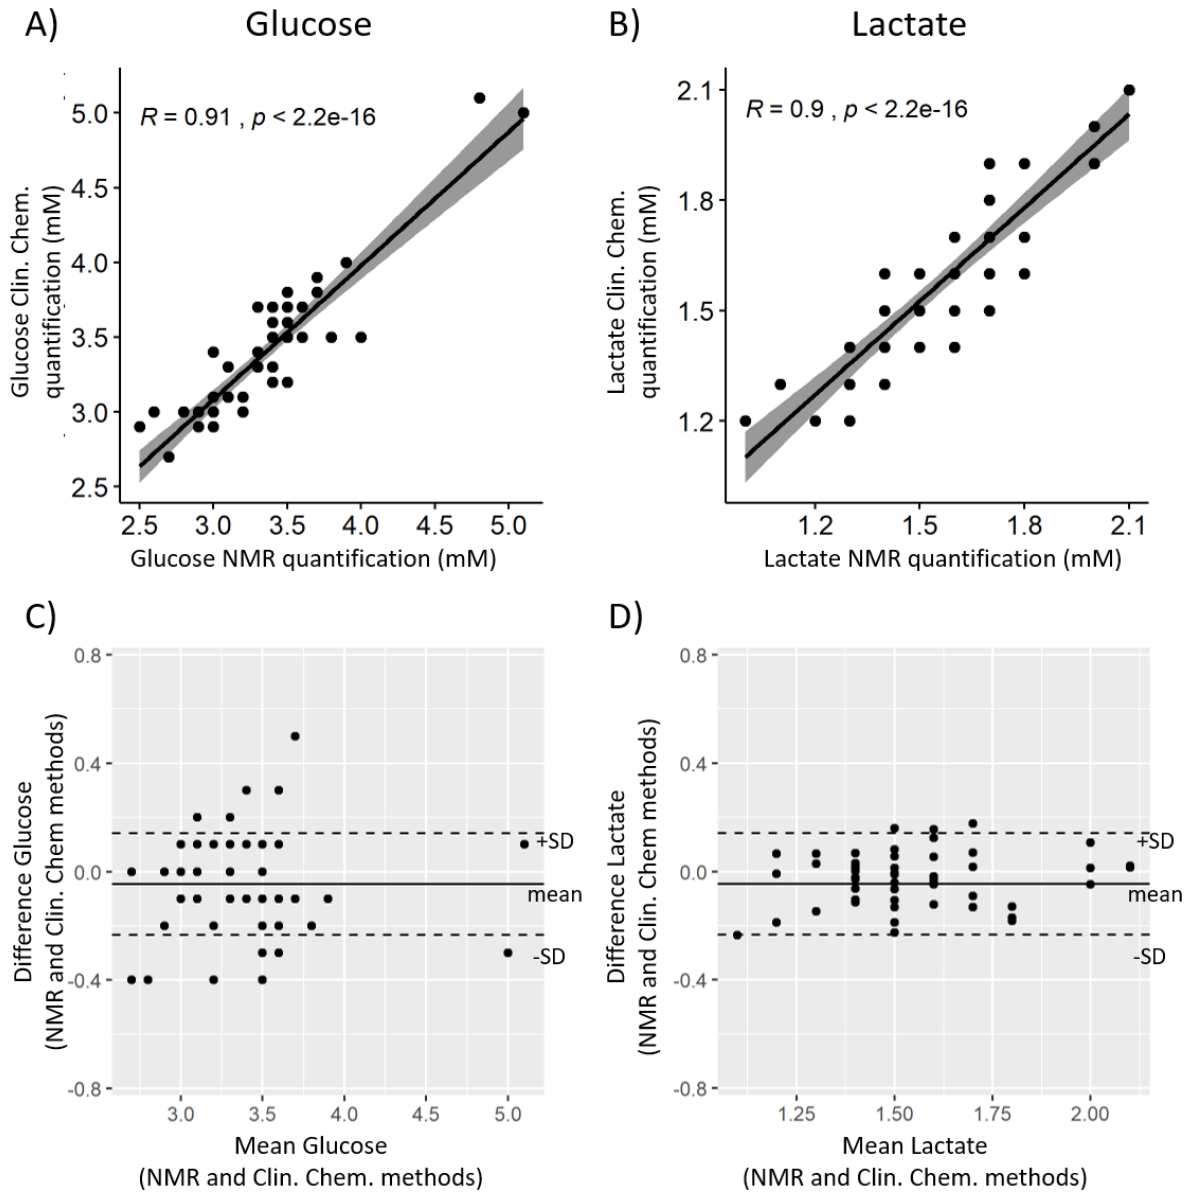

**Supplementary Figure 4. Agreement between metabolite concentrations determined by NMR metabolomics and standard laboratory chemistry methods.** Significant Pearson linear correlations were observed for (A) glucose and (B) lactate concentrations. (C-D) Bland-Altman plots illustrate excellent agreement between the two measurement methods.

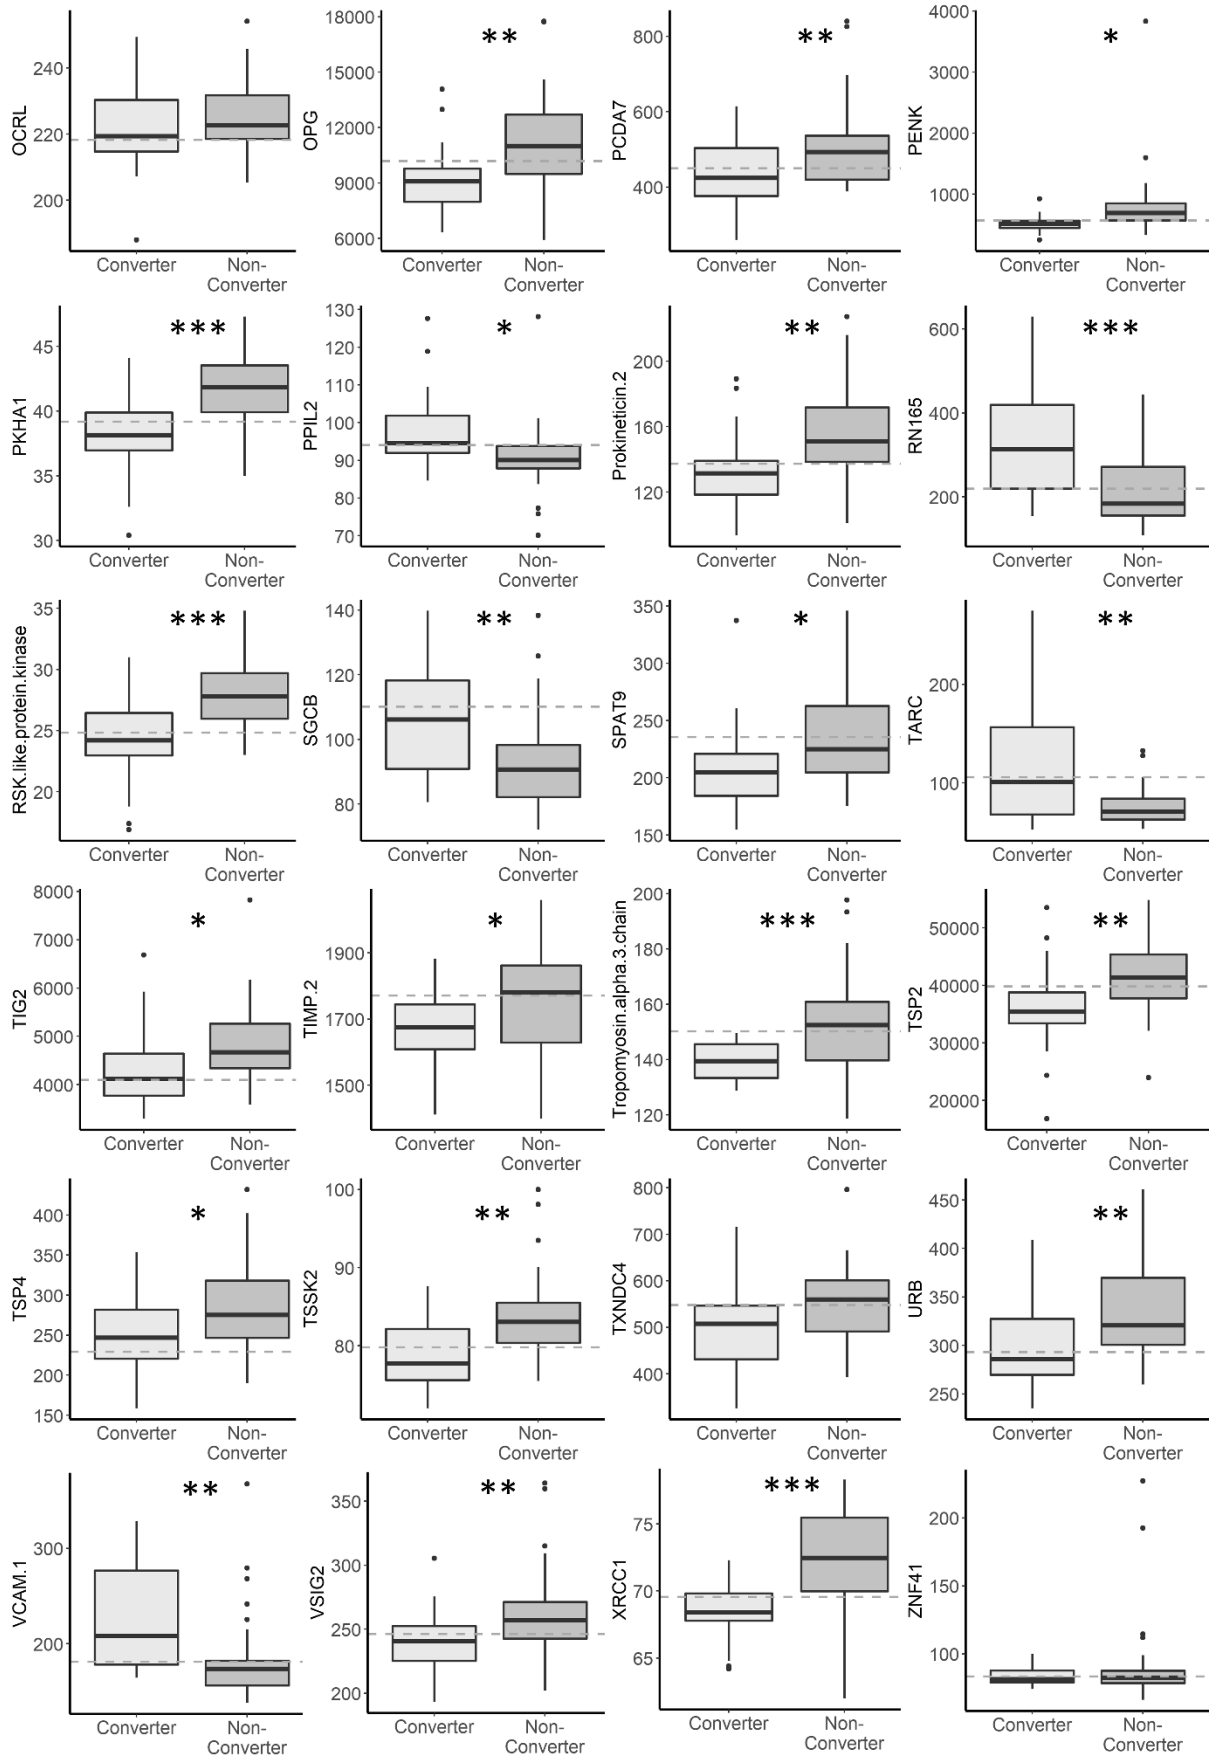

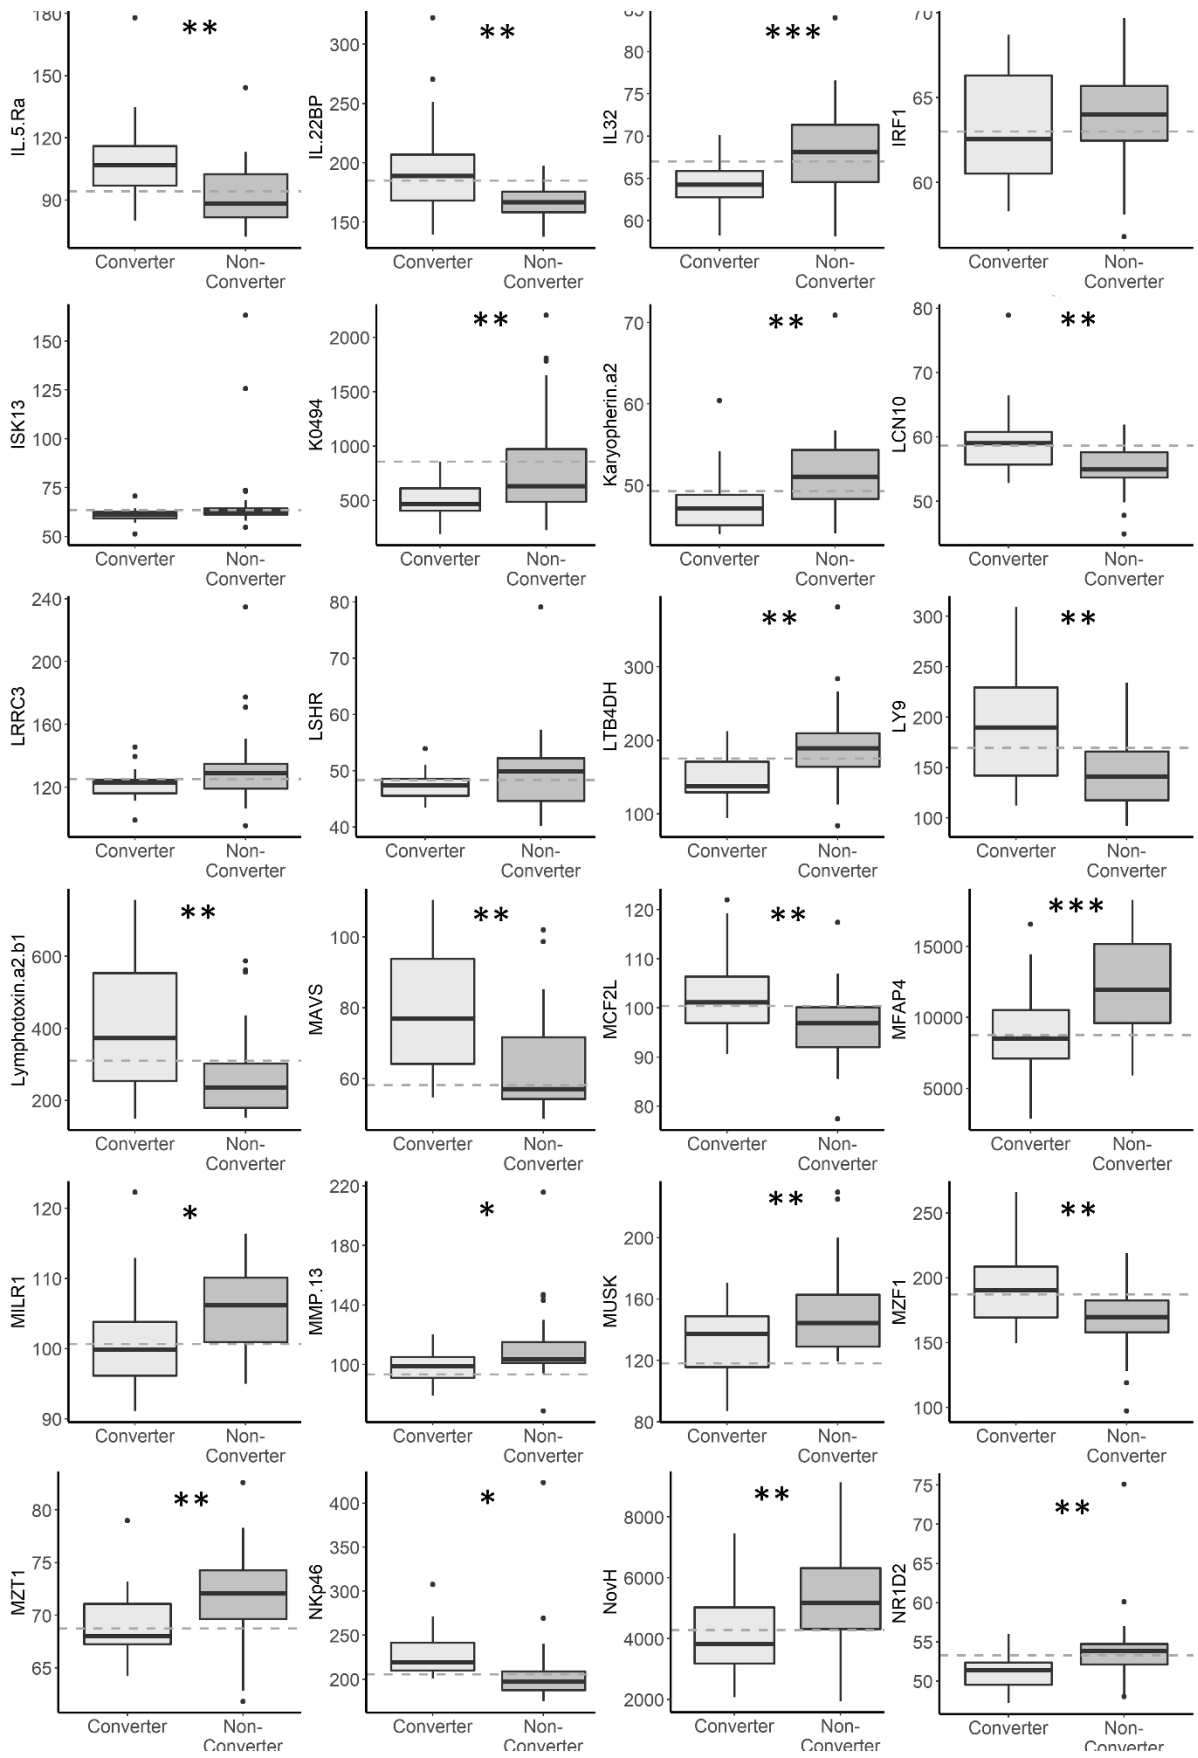

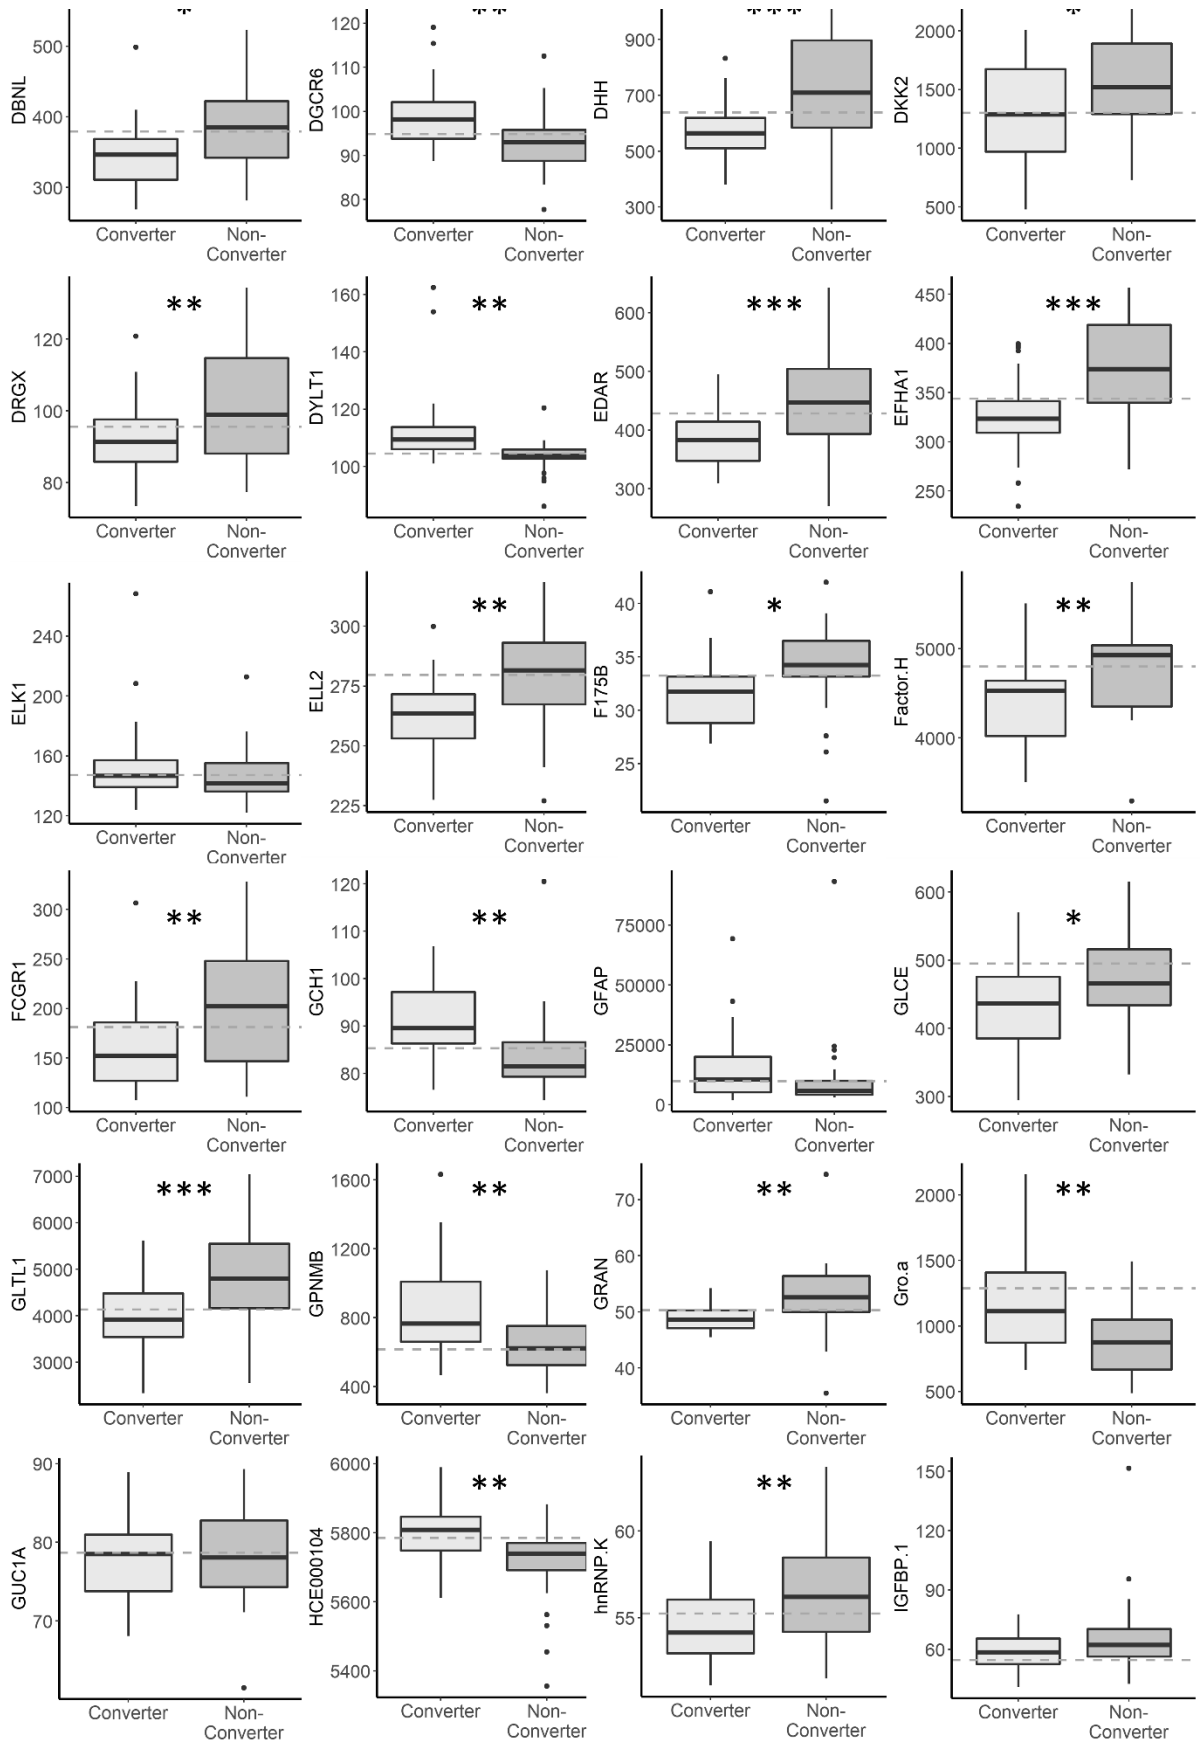



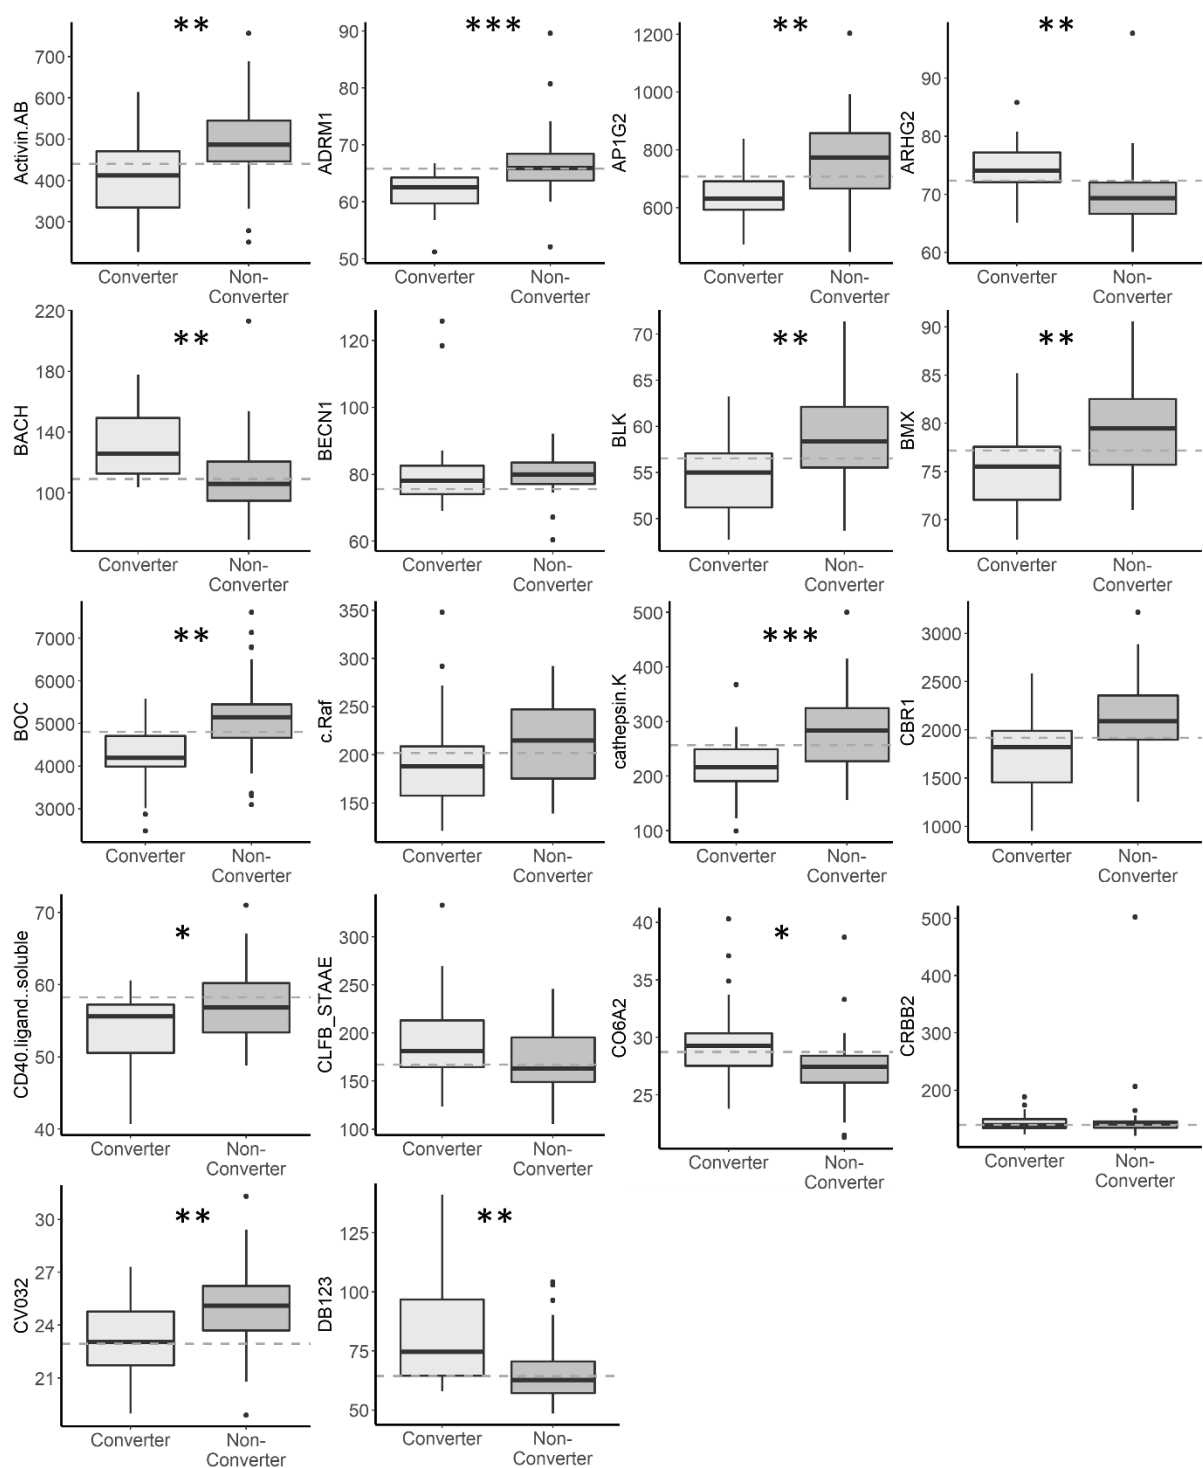

**Supplementary Figure 5. Boxplots of the 89 significant discriminatory proteins identified by the OPLS-DA analysis in converters (white) and non-converters (grey). Univariate p-values below 0.05, 0.01, and 0.001 are represented by \*, \*\*, \*\*\* respectively.**

**Supplementary Table 1.** Predictive performance of 89 identified CSF protein biomarkers identified by multivariate analysis. Biomarkers are listed from highest to lowest AUC. Abbreviations: AUC, area under the curve; CI, confidence interval, Acc, Accuracy; Sens, Sensitivity; Spec, specificity; PPV, positive predictive value; NPV, negative predictive value; ROC, receiver operator curve.

| Uniprot #     | Protein                                    | Gene ID | Perturbation                 | AUC [95% CI]     | Acc | Sens | Spec | PPV | NPV  | ROC threshold | Odds Ratio | P-value |
|---------------|--------------------------------------------|---------|------------------------------|------------------|-----|------|------|-----|------|---------------|------------|---------|
| <b>P63172</b> | Dynein light chain Tctex-type 1            | DYNLT1  | upregulated in converter     | 0.83 [0.71-0.95] | 78% | 92%  | 67%  | 69% | 91%  | 104.5         | 22.00      | <0.001  |
| <b>P18887</b> | DNA repair protein XRCC1                   | XRCC1   | upregulated in non-converter | 0.84 [0.72-0.95] | 80% | 82%  | 76%  | 84% | 73%  | 69.6          | 14.40      | <0.001  |
| <b>O76036</b> | Natural cytotoxicity triggering receptor 1 | NCR1    | upregulated in converter     | 0.79 [0.66-0.92] | 80% | 92%  | 69%  | 72% | 91%  | 205.5         | 25.56      | <0.001  |
| <b>P01210</b> | Proenkephalin-A                            | PENK    | upregulated in non-converter | 0.78 [0.65-0.91] | 78% | 83%  | 71%  | 78% | 77%  | 570.2         | 12.14      | 0.001   |
| <b>P28676</b> | Grancalcin                                 | GCA     | upregulated in non-converter | 0.77 [0.63-0.9]  | 74% | 82%  | 65%  | 72% | 77%  | 50.4          | 8.69       | 0.001   |
| <b>Q6ZSG1</b> | E3 ubiquitin-protein ligase RNF165         | RNF165  | upregulated in converter     | 0.84 [0.72-0.95] | 72% | 81%  | 63%  | 69% | 77%  | 219.7         | 7.48       | 0.002   |
| <b>O75582</b> | Ribosomal protein S6 kinase alpha-5        | RPS6KA5 | upregulated in non-converter | 0.79 [0.67-0.92] | 78% | 78%  | 78%  | 88% | 64%  | 24.9          | 12.25      | 0.002   |
| <b>P06753</b> | Tropomyosin alpha-3 chain                  | TPM3    | upregulated in non-converter | 0.69 [0.54-0.84] | 78% | 100% | 65%  | 63% | 100% | 150.3         | 73.33      | 0.001   |

|               |                                                         |         |                              |                  |     |     |     |     |     |        |       |       |
|---------------|---------------------------------------------------------|---------|------------------------------|------------------|-----|-----|-----|-----|-----|--------|-------|-------|
| <b>Q16186</b> | Proteasomal ubiquitin receptor ADRM1                    | ADRM1   | upregulated in non-converter | 0.74 [0.6-0.88]  | 72% | 90% | 61% | 59% | 91% | 65.9   | 14.62 | 0.003 |
| <b>Q7Z434</b> | Mitochondrial antiviral-signalling protein              | MAVS    | upregulated in converter     | 0.73 [0.59-0.87] | 70% | 90% | 59% | 56% | 91% | 58.2   | 12.86 | 0.002 |
| <b>P30793</b> | GTP cyclohydrolase 1                                    | GCH1    | upregulated in converter     | 0.74 [0.6-0.88]  | 76% | 85% | 67% | 72% | 82% | 85.3   | 11.50 | 0.003 |
| <b>Q92974</b> | Rho guanine nucleotide exchange factor 2                | ARHGEF2 | upregulated in converter     | 0.74 [0.6-0.88]  | 76% | 81% | 70% | 78% | 73% | 72.4   | 9.52  | 0.002 |
| <b>P52292</b> | Importin subunit alpha-1                                | KPNA2   | upregulated in non-converter | 0.78 [0.65-0.91] | 72% | 81% | 63% | 69% | 77% | 49.3   | 7.48  | 0.003 |
| <b>P55083</b> | Microfibril-associated glycoprotein 4                   | MFAP4   | upregulated in non-converter | 0.78 [0.65-0.91] | 78% | 78% | 78% | 88% | 64% | 8757.5 | 12.25 | 0.003 |
| <b>O00154</b> | Cytosolic acyl coenzyme A thioester hydrolase           | ACOT7   | upregulated in converter     | 0.78 [0.65-0.91] | 74% | 91% | 63% | 63% | 91% | 109.2  | 16.67 | 0.002 |
| <b>Q14995</b> | Nuclear receptor subfamily 1 group D member 2           | NR1D2   | upregulated in non-converter | 0.68 [0.54-0.83] | 72% | 90% | 61% | 59% | 91% | 53.3   | 14.62 | 0.004 |
| <b>Q9HB21</b> | Pleckstrin homology domain-containing family A member 1 | PLEKHA1 | upregulated in non-converter | 0.71 [0.57-0.86] | 78% | 81% | 73% | 81% | 73% | 39.2   | 11.56 | 0.01  |
| <b>P19320</b> | Vascular cell adhesion protein 1                        | VCAM1   | upregulated in converter     | 0.72 [0.58-0.86] | 72% | 79% | 64% | 72% | 73% | 181.1  | 6.81  | 0.001 |
| <b>Q9UNE0</b> | Tumor necrosis factor receptor superfamily member EDAR  | EDAR    | upregulated in non-converter | 0.72 [0.58-0.86] | 72% | 84% | 62% | 66% | 82% | 428.6  | 8.59  | 0.003 |

|               |                                                  |         |                              |                     |     |     |     |     |     |         |       |       |
|---------------|--------------------------------------------------|---------|------------------------------|---------------------|-----|-----|-----|-----|-----|---------|-------|-------|
| <b>P43235</b> | Cathepsin K                                      | CTSK    | upregulated in non-converter | 0.74<br>[0.6-0.88]  | 72% | 84% | 62% | 66% | 82% | 257.1   | 8.59  | 0.01  |
| <b>Q8IYU8</b> | Calcium uptake protein 2, mitochondrial          | MICU2   | upregulated in non-converter | 0.7<br>[0.55-0.85]  | 74% | 82% | 65% | 72% | 77% | 344.1   | 8.69  | 0.005 |
| <b>P24001</b> | Interleukin-32                                   | IL32    | upregulated in non-converter | 0.72<br>[0.57-0.86] | 72% | 90% | 61% | 59% | 91% | 67      | 14.62 | 0.004 |
| <b>Q14914</b> | Prostaglandin reductase 1                        | PTGR1   | upregulated in non-converter | 0.75<br>[0.61-0.89] | 74% | 85% | 64% | 69% | 82% | 175.5   | 9.90  | 0.002 |
| <b>O75843</b> | AP-1 complex subunit gamma-like 2                | AP1G2   | upregulated in non-converter | 0.75<br>[0.62-0.89] | 74% | 85% | 64% | 69% | 82% | 708.5   | 9.90  | 0.01  |
| <b>Q01344</b> | Interleukin-5 receptor subunit alpha             | IL5RA   | upregulated in converter     | 0.75<br>[0.61-0.89] | 74% | 82% | 65% | 72% | 77% | 94.3    | 8.69  | 0.01  |
| <b>Q8N688</b> | Beta-defensin 123                                | DEFB123 | upregulated in converter     | 0.79<br>[0.67-0.92] | 69% | 80% | 59% | 63% | 77% | 64.4    | 5.67  | 0.01  |
| <b>Q8N428</b> | Polypeptide N-acetylgalactosaminyltransferase 16 | GALNT16 | upregulated in non-converter | 0.75<br>[0.62-0.89] | 74% | 78% | 68% | 78% | 68% | 4138.8  | 7.65  | 0.005 |
| <b>P01374</b> | Lymphotoxin-alpha                                | LTA     | upregulated in converter     | 0.76<br>[0.62-0.89] | 74% | 78% | 68% | 78% | 68% | 310.4   | 7.65  | 0.005 |
| <b>Q9BWV1</b> | Brother of CDO                                   | BOC     | upregulated in non-converter | 0.72<br>[0.57-0.86] | 74% | 85% | 64% | 69% | 82% | 4808.5  | 9.90  | 0.01  |
| <b>P35442</b> | Thrombospondin-2                                 | THBS2   | upregulated in non-converter | 0.71<br>[0.56-0.85] | 72% | 84% | 62% | 66% | 82% | 39830.9 | 8.59  | 0.004 |

|               |                                                       |           |                              |                     |     |     |     |     |     |         |       |       |
|---------------|-------------------------------------------------------|-----------|------------------------------|---------------------|-----|-----|-----|-----|-----|---------|-------|-------|
| <b>Q9HC23</b> | Prokineticin-2                                        | PROK2     | upregulated in non-converter | 0.73<br>[0.59-0.87] | 76% | 81% | 70% | 78% | 73% | 137.4   | 9.52  | 0.005 |
| <b>Q08AG7</b> | Mitotic-spindle organizing protein 1                  | MZT1      | upregulated in non-converter | 0.74<br>[0.6-0.88]  | 76% | 79% | 71% | 81% | 68% | 68.8    | 9.29  | 0.01  |
| <b>P51813</b> | Cytoplasmic tyrosine-protein kinase BMX               | BMX       | upregulated in non-converter | 0.74<br>[0.6-0.88]  | 69% | 78% | 59% | 66% | 73% | 77.2    | 5.09  | 0.02  |
| <b>Q969J5</b> | Interleukin-22 receptor subunit alpha-2               | IL22RA2   | upregulated in converter     | 0.75<br>[0.61-0.88] | 76% | 76% | 76% | 88% | 59% | 185.1   | 10.11 | 0.01  |
| <b>Q6JVE6</b> | Epididymal-specific lipocalin-10                      | LCN10     | upregulated in converter     | 0.77<br>[0.64-0.91] | 74% | 74% | 75% | 88% | 55% | 58.7    | 8.40  | 0.004 |
| <b>Q96PF2</b> | Testis-specific serine                                | TSSK2     | upregulated in non-converter | 0.72<br>[0.58-0.86] | 72% | 74% | 68% | 81% | 59% | 79.8    | 6.26  | 0.005 |
| <b>P08603</b> | Complement factor H                                   | CFH       | upregulated in non-converter | 0.78<br>[0.65-0.91] | 72% | 90% | 61% | 59% | 91% | 4803.9  | 14.62 | 0.01  |
| <b>O00472</b> | RNA polymerase II elongation factor ELL2              | ELL2      | upregulated in non-converter | 0.79<br>[0.66-0.92] | 69% | 89% | 57% | 53% | 91% | 279.8   | 11.33 | 0.01  |
| <b>O00300</b> | Tumor necrosis factor receptor superfamily member 11B | TNFRSF11B | upregulated in non-converter | 0.71<br>[0.57-0.86] | 74% | 85% | 64% | 69% | 82% | 10188.4 | 9.90  | 0.01  |
| <b>O43323</b> | Desert hedgehog protein                               | DHH       | upregulated in non-converter | 0.72<br>[0.57-0.86] | 72% | 84% | 62% | 66% | 82% | 639     | 8.59  | 0.01  |
| <b>Q14956</b> | Transmembrane glycoprotein NMB                        | GPNMB     | upregulated in converter     | 0.76<br>[0.62-0.9]  | 65% | 84% | 54% | 50% | 86% | 616.9   | 6.33  | 0.02  |

|                      |                                                      |             |                              |                     |     |     |     |     |     |        |       |      |
|----------------------|------------------------------------------------------|-------------|------------------------------|---------------------|-----|-----|-----|-----|-----|--------|-------|------|
| <b>Q15018</b>        | BRISC complex subunit Abraxas 2                      | ABRAXAS2    | upregulated in non-converter | 0.72<br>[0.57-0.86] | 76% | 83% | 68% | 75% | 77% | 33.3   | 10.20 | 0.01 |
| <b>P51451</b>        | Tyrosine-protein kinase Blk                          | BLK         | upregulated in non-converter | 0.72<br>[0.58-0.87] | 69% | 78% | 59% | 66% | 73% | 56.6   | 5.09  | 0.02 |
| <b>Q7Z6M3</b>        | Allergin-1                                           | MILR1       | upregulated in non-converter | 0.73<br>[0.59-0.87] | 72% | 76% | 67% | 78% | 64% | 100.7  | 6.25  | 0.01 |
| <b>P16152</b>        | Carbonyl reductase [NADPH] 1                         | CBR1        | upregulated in non-converter | 0.77<br>[0.63-0.9]  | 70% | 75% | 64% | 75% | 64% | 1917.3 | 5.25  | 0.01 |
| <b>Q9HBG7</b>        | T-lymphocyte surface antigen Ly-9                    | LY9         | upregulated in converter     | 0.76<br>[0.63-0.9]  | 70% | 75% | 64% | 75% | 64% | 169.5  | 5.25  | 0.01 |
| <b>Q14129</b>        | Protein DGCR6                                        | DGCR6       | upregulated in converter     | 0.74<br>[0.6-0.88]  | 72% | 79% | 64% | 72% | 73% | 94.9   | 6.81  | 0.01 |
| <b>P08476/P09529</b> | Inhibin beta A/B chain                               | INHBA/INHBB | upregulated in non-converter | 0.75<br>[0.62-0.89] | 74% | 78% | 68% | 78% | 68% | 440.1  | 7.65  | 0.03 |
| <b>P48745</b>        | CCN family member 3                                  | CCN3        | upregulated in non-converter | 0.73<br>[0.59-0.87] | 72% | 77% | 65% | 75% | 68% | 4284.3 | 6.43  | 0.02 |
| <b>Q96IQ7</b>        | V-set and immunoglobulin domain-containing protein 2 | VSIG2       | upregulated in non-converter | 0.73<br>[0.58-0.87] | 70% | 77% | 63% | 72% | 68% | 246.5  | 5.48  | 0.01 |
| <b>Q13356</b>        | RING-type E3 ubiquitin-protein ligase PPIL2          | PPIL2       | upregulated in converter     | 0.66<br>[0.51-0.81] | 72% | 74% | 68% | 81% | 59% | 94.1   | 6.26  | 0.03 |
| <b>Q99969</b>        | Retinoic acid receptor responder protein 2           | RARRES2     | upregulated in non-converter | 0.73<br>[0.59-0.87] | 74% | 73% | 79% | 91% | 50% | 4102.7 | 9.67  | 0.01 |

|               |                                                      |         |                              |                     |     |      |     |     |      |        |       |      |
|---------------|------------------------------------------------------|---------|------------------------------|---------------------|-----|------|-----|-----|------|--------|-------|------|
| <b>Q9H4I9</b> | Essential MCU regulator, mitochondrial               | SMĐT1   | upregulated in non-converter | 0.78<br>[0.65-0.91] | 74% | 73%  | 79% | 91% | 50%  | 23     | 9.67  | 0.02 |
| <b>Q16585</b> | Beta-sarcoglycan                                     | SGCB    | upregulated in converter     | 0.77<br>[0.64-0.9]  | 72% | 72%  | 73% | 88% | 50%  | 110.2  | 7.00  | 0.01 |
| <b>P09341</b> | Growth-regulated alpha protein                       | CXCL1   | upregulated in converter     | 0.73<br>[0.58-0.87] | 72% | 70%  | 82% | 94% | 41%  | 1289.6 | 10.38 | 0.03 |
| <b>P12314</b> | High affinity immunoglobulin gamma Fc receptor I     | FCGR1A  | upregulated in non-converter | 0.78<br>[0.65-0.91] | 70% | 79%  | 62% | 69% | 73%  | 181.2  | 5.87  | 0.01 |
| <b>P12110</b> | Collagen alpha-2(VI) chain                           | COL6A2  | upregulated in converter     | 0.67<br>[0.52-0.82] | 72% | 74%  | 68% | 81% | 59%  | 28.8   | 6.26  | 0.01 |
| <b>Q76M96</b> | Coiled-coil domain-containing protein 80             | CCDC80  | upregulated in non-converter | 0.71<br>[0.56-0.85] | 72% | 73%  | 71% | 84% | 55%  | 293.1  | 6.48  | 0.03 |
| <b>O15068</b> | Guanine nucleotide exchange factor DBS               | MCF2L   | upregulated in converter     | 0.71<br>[0.56-0.85] | 69% | 71%  | 63% | 78% | 55%  | 100.4  | 4.29  | 0.02 |
| <b>P45452</b> | Collagenase 3                                        | MMP13   | upregulated in non-converter | 0.72<br>[0.57-0.86] | 74% | 70%  | 90% | 97% | 41%  | 93.5   | 21.46 | 0.02 |
| <b>Q1W4C9</b> | Serine protease inhibitor Kazal-type 13              | SPINK13 | upregulated in non-converter | 0.62<br>[0.46-0.77] | 63% | 88%  | 53% | 44% | 91%  | 63.6   | 7.78  | 0.02 |
| <b>P28698</b> | Myeloid zinc finger 1                                | MZF1    | upregulated in converter     | 0.74<br>[0.59-0.88] | 74% | 75%  | 72% | 84% | 59%  | 187.3  | 7.80  | 0.03 |
| <b>O75071</b> | EF-hand calcium-binding domain-containing protein 14 | EFCAB14 | upregulated in non-converter | 0.75<br>[0.62-0.89] | 61% | 100% | 51% | 34% | 100% | 857.1  | 23.05 | 0.03 |

|               |                                                   |        |                              |                     |     |     |      |      |     |        |       |      |
|---------------|---------------------------------------------------|--------|------------------------------|---------------------|-----|-----|------|------|-----|--------|-------|------|
| <b>Q9BWV2</b> | Spermatogenesis-associated protein 9              | SPATA9 | upregulated in non-converter | 0.73<br>[0.59-0.87] | 63% | 83% | 53%  | 47%  | 86% | 235.6  | 5.59  | 0.02 |
| <b>Q92583</b> | C-C motif chemokine 17                            | CCL17  | upregulated in converter     | 0.68<br>[0.53-0.83] | 76% | 73% | 85%  | 94%  | 50% | 106    | 15.00 | 0.03 |
| <b>O94923</b> | D-glucuronyl C5-epimerase                         | GLCE   | upregulated in non-converter | 0.56<br>[0.41-0.72] | 61% | 92% | 51%  | 38%  | 95% | 495.1  | 12.60 | 0.04 |
| <b>Q9UJU6</b> | Drebrin-like protein                              | DBNL   | upregulated in non-converter | 0.66<br>[0.51-0.81] | 67% | 82% | 56%  | 56%  | 82% | 379.5  | 5.79  | 0.03 |
| <b>A6NNA5</b> | Dorsal root ganglia homeobox protein              | DRGX   | upregulated in non-converter | 0.59<br>[0.44-0.75] | 69% | 78% | 59%  | 66%  | 73% | 95.7   | 5.09  | 0.01 |
| <b>P61978</b> | Heterogeneous nuclear ribonucleoprotein K         | HNRNPK | upregulated in non-converter | 0.57<br>[0.41-0.73] | 67% | 73% | 58%  | 69%  | 64% | 55.3   | 3.85  | 0.06 |
| <b>O15146</b> | Muscle, skeletal receptor tyrosine-protein kinase | MUSK   | upregulated in non-converter | 0.73<br>[0.59-0.87] | 74% | 70% | 100% | 100% | 36% | 118.1  | 36.57 | 0.02 |
| <b>P16035</b> | Metalloproteinase inhibitor 2                     | TIMP2  | upregulated in non-converter | 0.63<br>[0.47-0.78] | 67% | 85% | 56%  | 53%  | 86% | 1771.4 | 7.18  | 0.02 |
| <b>Q9UN72</b> | Protocadherin alpha-7                             | PCDHA7 | upregulated in non-converter | 0.68<br>[0.53-0.83] | 70% | 77% | 63%  | 72%  | 68% | 450.2  | 5.48  | 0.04 |
| <b>Q9BS26</b> | Endoplasmic reticulum resident protein 44         | ERP44  | upregulated in non-converter | 0.67<br>[0.52-0.82] | 65% | 78% | 55%  | 56%  | 77% | 548.4  | 4.37  | 0.04 |
| <b>Q9UBU2</b> | Dickkopf-related protein 2                        | DKK2   | upregulated in non-converter | 0.64<br>[0.48-0.79] | 67% | 71% | 60%  | 75%  | 55% | 1302.6 | 3.60  | 0.04 |



|               |                                                                      |        |                              |                     |     |     |     |     |     |        |      |      |
|---------------|----------------------------------------------------------------------|--------|------------------------------|---------------------|-----|-----|-----|-----|-----|--------|------|------|
| <b>P35443</b> | Thrombospondin-4                                                     | THBS4  | upregulated in non-converter | 0.68<br>[0.53-0.83] | 70% | 69% | 75% | 91% | 41% | 229.3  | 6.69 | 0.03 |
| <b>P29965</b> | CD40 ligand                                                          | CD40LG | upregulated in non-converter | 0.65<br>[0.5-0.8]   | 61% | 87% | 51% | 41% | 91% | 58.3   | 6.84 | 0.06 |
| <b>O86476</b> | OS=Staphylococcus aureus (strain Newman) OX=426430 GN=clfB PE=1 SV=2 | None   | upregulated in converter     | 0.66<br>[0.5-0.81]  | 65% | 76% | 55% | 59% | 73% | 167.3  | 3.90 | 0.07 |
| <b>P04049</b> | RAF proto-oncogene serine                                            | RAF1   | upregulated in non-converter | 0.65<br>[0.5-0.8]   | 65% | 74% | 56% | 63% | 68% | 202.2  | 3.57 | 0.08 |
| <b>Q9BY71</b> | Leucine-rich repeat-containing protein 3                             | LRRC3  | upregulated in non-converter | 0.73<br>[0.58-0.87] | 67% | 82% | 56% | 56% | 82% | 125.4  | 5.79 | 0.08 |
| <b>P22888</b> | Lutropin-choriogonadotropic hormone receptor                         | LHCGR  | upregulated in non-converter | 0.69<br>[0.55-0.84] | 67% | 77% | 57% | 63% | 73% | 48.4   | 4.44 | 0.13 |
| <b>P14136</b> | Glial fibrillary acidic protein                                      | GFAP   | upregulated in converter     | 0.7<br>[0.56-0.85]  | 69% | 73% | 62% | 75% | 59% | 9851.5 | 4.33 | 0.13 |
| <b>P08833</b> | Insulin-like growth factor-binding protein 1                         | IGFBP1 | upregulated in non-converter | 0.55<br>[0.39-0.71] | 67% | 68% | 63% | 81% | 45% | 54.7   | 3.61 | 0.1  |
| <b>Q14457</b> | Beclin-1                                                             | BECN1  | upregulated in converter     | 0.65<br>[0.5-0.81]  | 33% | 36% | 33% | 16% | 59% | 75.7   | 0.27 | 0.21 |
| <b>Q01968</b> | Inositol polyphosphate 5-phosphatase OCRL-1                          | OCRL   | upregulated in non-converter | 0.68<br>[0.53-0.83] | 67% | 69% | 61% | 78% | 50% | 218.3  | 3.57 | 0.3  |
| <b>P10914</b> | Interferon regulatory factor 1                                       | IRF1   | upregulated in non-converter | 0.69<br>[0.54-0.84] | 67% | 72% | 59% | 72% | 59% | 63     | 3.69 | 0.33 |

|               |                                       |        |                              |                     |     |     |     |     |     |       |      |      |
|---------------|---------------------------------------|--------|------------------------------|---------------------|-----|-----|-----|-----|-----|-------|------|------|
| <b>P19419</b> | ETS domain-containing protein Elk-1   | ELK1   | upregulated in converter     | 0.48<br>[0.32-0.64] | 61% | 67% | 52% | 69% | 50% | 147.2 | 2.20 | 0.36 |
| <b>P51814</b> | Zinc finger protein 41                | ZNF41  | upregulated in non-converter | 0.52<br>[0.36-0.68] | 56% | 68% | 47% | 47% | 68% | 83.5  | 1.89 | 0.53 |
| <b>P43320</b> | Beta-crystallin B2                    | CRYBB2 | upregulated in non-converter | 0.46<br>[0.31-0.62] | 59% | 67% | 50% | 63% | 55% | 139.4 | 2.00 | 0.76 |
| <b>P43080</b> | Guanylyl cyclase-activating protein 1 | GUCA1A | upregulated in non-converter | 0.59<br>[0.43-0.74] | 46% | 56% | 38% | 44% | 50% | 78.7  | 0.78 | 0.88 |

**Supplementary Table 2.** Predictive performance of the top 20 identified CSF protein biomarkers with highest sensitivity compared to the performance of OCGB status. Proteins are listed from highest to lowest sensitivity. Abbreviations: AUC, area under the curve; CI, confidence interval, Acc, Accuracy; Sens, Sensitivity; Spec, specificity; PPV, positive predictive value; NPV, negative predictive value; ROC, receiver operator curve.

|                    | <b>AUC<br/>[95% CI]</b> | <b>Acc</b> | <b>Sens</b> | <b>Spec</b> | <b>PPV</b> | <b>NPV</b> | <b>ROC<br/>threshold</b> | <b>Odds<br/>Ratio</b> | <b>P-value</b> |
|--------------------|-------------------------|------------|-------------|-------------|------------|------------|--------------------------|-----------------------|----------------|
| <b>TPM3</b>        | 0.69<br>[0.54-0.84]     | 78%        | 100%        | 63%         | 65%        | 100%       | 150.3                    | 73.33                 | 0.001          |
| <b>EFCAB14</b>     | 0.75<br>[0.62-0.89]     | 61%        | 100%        | 34%         | 51%        | 100%       | 857.1                    | 23.05                 | 0.03           |
| <b>OCGB status</b> | 0.66<br>[0.5-0.81]      | 59%        | 100%        | 31%         | 50%        | 100%       | 0.5                      | 21.00                 | 0.01           |
| <b>GLCE</b>        | 0.56<br>[0.41-0.72]     | 0.61       | 0.95        | 0.38        | 0.51       | 0.92       | 495.1                    | 12.60                 | 0.04           |
| <b>DYNLT1</b>      | 0.83<br>[0.71-0.95]     | 78%        | 91%         | 69%         | 67%        | 92%        | 104.5                    | 22.00                 | <0.001         |
| <b>NCR1</b>        | 0.79<br>[0.66-0.92]     | 80%        | 91%         | 72%         | 69%        | 92%        | 205.5                    | 25.56                 | <0.001         |
| <b>ADRM1</b>       | 0.74<br>[0.6-0.88]      | 72%        | 91%         | 59%         | 61%        | 90%        | 65.9                     | 14.62                 | 0.003          |
| <b>MAVS</b>        | 0.73<br>[0.59-0.87]     | 70%        | 91%         | 56%         | 59%        | 90%        | 58.2                     | 12.86                 | 0.002          |
| <b>ACOT7</b>       | 0.78<br>[0.65-0.91]     | 74%        | 91%         | 63%         | 63%        | 91%        | 109.2                    | 16.67                 | 0.002          |
| <b>NR1D2</b>       | 0.68                    | 72%        | 91%         | 59%         | 61%        | 90%        | 53.3                     | 14.62                 | 0.004          |

|                |                     |     |     |     |     |     |        |       |       |
|----------------|---------------------|-----|-----|-----|-----|-----|--------|-------|-------|
|                | [0.54-0.83]         |     |     |     |     |     |        |       |       |
| <b>IL32</b>    | 0.72<br>[0.57-0.86] | 72% | 91% | 59% | 61% | 90% | 67     | 14.62 | 0.004 |
| <b>CFH</b>     | 0.78<br>[0.65-0.91] | 72% | 91% | 59% | 61% | 90% | 4803.9 | 14.62 | 0.01  |
| <b>ELL2</b>    | 0.79<br>[0.66-0.92] | 69% | 91% | 53% | 57% | 89% | 279.8  | 11.33 | 0.01  |
| <b>SPINK13</b> | 0.62<br>[0.46-0.77] | 63% | 91% | 44% | 53% | 88% | 63.6   | 7.78  | 0.02  |
| <b>CD40LG</b>  | 0.65<br>[0.5-0.8]   | 61% | 91% | 41% | 51% | 87% | 58.3   | 6.84  | 0.06  |
| <b>GPNMB</b>   | 0.76<br>[0.62-0.9]  | 65% | 86% | 50% | 54% | 84% | 616.9  | 6.33  | 0.02  |
| <b>SPATA9</b>  | 0.73<br>[0.59-0.87] | 63% | 86% | 47% | 53% | 83% | 235.6  | 5.59  | 0.02  |
| <b>TIMP2</b>   | 0.63<br>[0.47-0.78] | 67% | 86% | 53% | 56% | 85% | 1771.4 | 7.18  | 0.02  |
| <b>GCH1</b>    | 0.74<br>[0.6-0.88]  | 76% | 82% | 72% | 67% | 85% | 85.3   | 11.50 | 0.003 |
| <b>EDAR</b>    | 0.72<br>[0.58-0.86] | 72% | 82% | 66% | 62% | 84% | 428.6  | 8.59  | 0.003 |
| <b>CTSK</b>    | 0.74<br>[0.6-0.88]  | 72% | 82% | 66% | 62% | 84% | 257.1  | 8.59  | 0.01  |
| <b>PTGR1</b>   | 0.75<br>[0.61-0.89] | 74% | 82% | 69% | 64% | 85% | 175.5  | 9.90  | 0.002 |

## **Detailed statistical methods.**

### Stage 1. Model validation

OPLS-DA models were optimized by internal 7-fold cross-validation. The quality of classification was assessed using a 10-fold external cross-validation scheme with 1000 repetitions in total, correcting for unequal class sizes. This validation scheme involves multiple iterations of splitting the data into training and testing sets, which ensures that any discrimination observed in the models cannot have occurred by chance. The training data is used to estimate the model parameters (number of components,  $R^2$  – the ‘goodness’ of fit, and  $Q^2$  – the internal predictive performance of the model on the training dataset) and learn the underlying discriminatory patterns between the groups under consideration, whereas the independent test set is employed to assess the accuracy, sensitivity, specificity, and generalizability of the trained models in the ensemble. We quantified the outcome of the cross validation by calculating the accuracy, sensitivity, and specificity of each model ( $n = 1000$ ) from the predicted classifications of the external independent test set, which was not used to build each model. It is important to appreciate that the classifier (OPLS-DA) was blinded to each test set when training each model. This validation scheme tends to avoid over-fitting and helps assess the generalizability of the model to previously unseen datasets. For an exhaustive discussion on validation of this approach see Arlot and Celisse (2010). These values were compared with those of a null distribution (obtained from randomly permuting the classifications) using the two-sided Kolmogorov-Smirnov test (significant if p-value 0.05 or less).

### Stage 2. Prediction and identification of discriminatory metabolites.

If stage 1 of the analysis reveals that the OPLS-DA classifier performs significantly better than chance, the separation observed between classes is confirmed and it is valid to interrogate metabolites driving the separation and to use the data for prediction of additional samples. Discriminatory variables were identified by calculating the average of the variable importance (VIP) scores of the ensemble of models. A VIP cut-off of 1.5 was used to identify the most important variables driving the separation between classes. Two-sample t-tests and ROC analysis was applied to each of the variables identified as discriminatory by the multivariate analysis to investigate the diagnostic accuracy of each biomarker in isolation. The p-values obtained were then corrected for multiple comparisons using the Bonferroni correction.
